# Supplementary material
Source: Springer Nature journal article supplement (https://www.springermedizin.de/resource/supplementary/13256_2007_376_MOESM1_ESM.pdf/9645842)

[R]

[L]

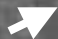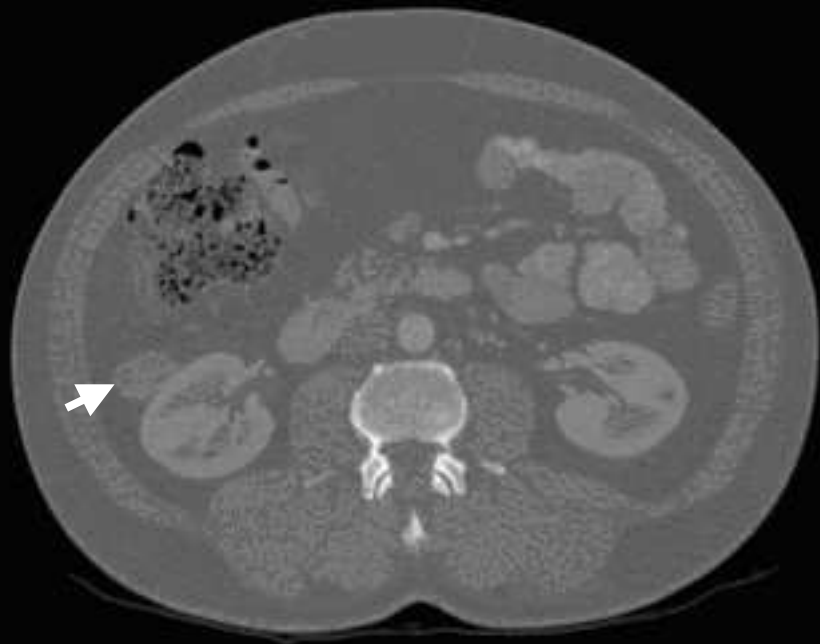

Supplement: MOESM1 [file 9645842]
